# Supplementary material for: A Randomized Feeding Trial of Iron-Biofortified Beans in School Children in Mexico
Source: PubMed Central journal article supplement (PMC6412428; doi:10.3390/nu11020381), 2019-02-12
Supplement: nutrients-11-00381-s001.pdf [file nutrients-11-00381-s001.pdf]

## Online Supplemental Material

**Table I.** Effect of total iron consumed on iron status in children, adjusted for intervention ( $n = 571$ ).

| Observed outcomes at endline                    | <i>n</i> | Effect of total iron consumed <sup>1</sup> |                              |
|-------------------------------------------------|----------|--------------------------------------------|------------------------------|
|                                                 |          | $\beta$ (SE) or RR (95% CI)                | <i>p</i> -value <sup>2</sup> |
| Hemoglobin, <sup>3</sup> g/dL                   | 571      | -0.42 (0.48)                               | 0.39                         |
| Anemic                                          |          | 3.40 (0.53, 21.94)                         | 0.20                         |
| Serum ferritin, <sup>4</sup> $\mu$ g/L          | 571      | 0.04 (0.14)                                | 0.77                         |
| <15.0 $\mu$ g/L                                 |          | 1.25 (0.06, 24.71)                         | 0.88                         |
| <20.0 $\mu$ g/L                                 |          | 1.78 (0.34, 9.31)                          | 0.50                         |
| <30.0 $\mu$ g/L                                 |          | 0.52 (0.22, 1.22)                          | 0.13                         |
| Serum ferritin (BRINDA), <sup>4</sup> $\mu$ g/L | 561      | 0.04 (0.13)                                | 0.76                         |
| <15.0 $\mu$ g/L                                 |          | 1.92 (0.14, 27.17)                         | 0.63                         |
| <20.0 $\mu$ g/L                                 |          | 0.62 (0.18, 2.11)                          | 0.45                         |
| <30.0 $\mu$ g/L                                 |          | 0.67 (0.32, 1.41)                          | 0.29                         |
| sTfR (Ramco corrected), <sup>4</sup> mg/L       | 571      | 0.00 (0.04)                                | 0.94                         |
| Total body iron, mg/kg                          | 571      | 0.16 (0.48)                                | 0.73                         |
| Total body iron (BRINDA), mg/kg                 | 561      | 0.14 (0.45)                                | 0.76                         |
| CRP, <sup>4</sup> mg/L                          | 566      | -0.33 (0.42)                               | 0.43                         |
| >5.0 mg/L                                       |          | 0.66 (0.04, 10.46)                         | 0.77                         |
| AGP, <sup>4</sup> g/L                           | 566      | -0.09 (0.09)                               | 0.31                         |
| >1.0 g/L                                        |          | 0.12 (0.02, 0.86)                          | 0.03                         |

<sup>1</sup> For every 1g of iron consumed. <sup>2</sup> Effects of iron consumed from beans on endline outcome, adjusted for baseline indicator and intervention, with school as a random effect. Generalized linear mixed models were used to examine the effect of total iron consumed on hematological outcomes, with school as a random effect. <sup>3</sup> Hemoglobin was adjusted for altitude. Abbreviations used: AGP,  $\alpha$ -1-acid glycoprotein; CRP (C-Reactive Protein)
